# Supplementary material
Source: ML conference proceedings conference paper supplement (https://openreview.net/forum?id=LpY1jgtk8I)

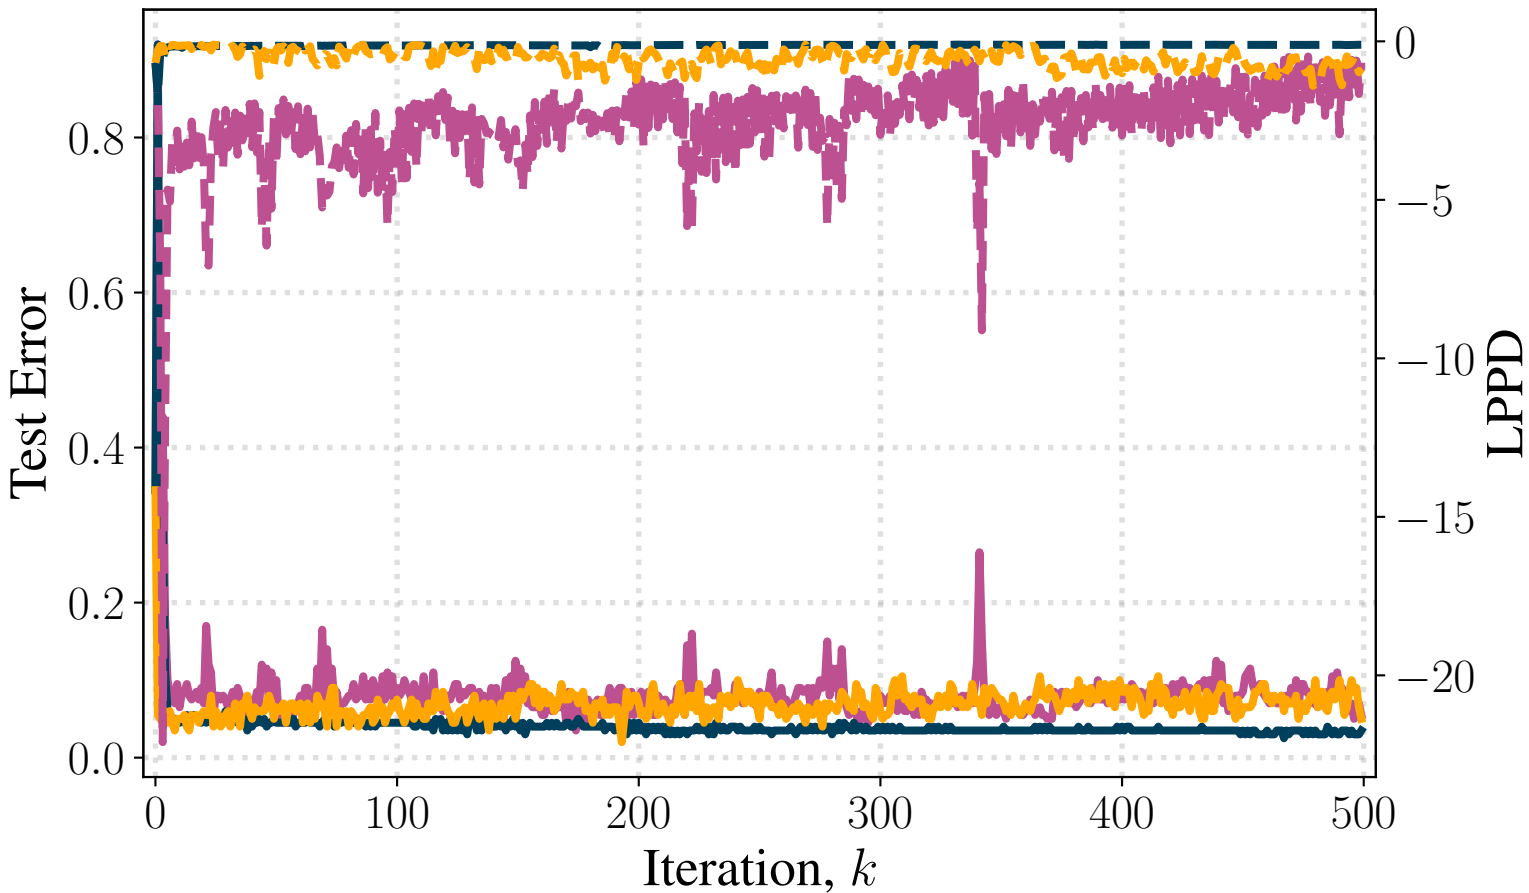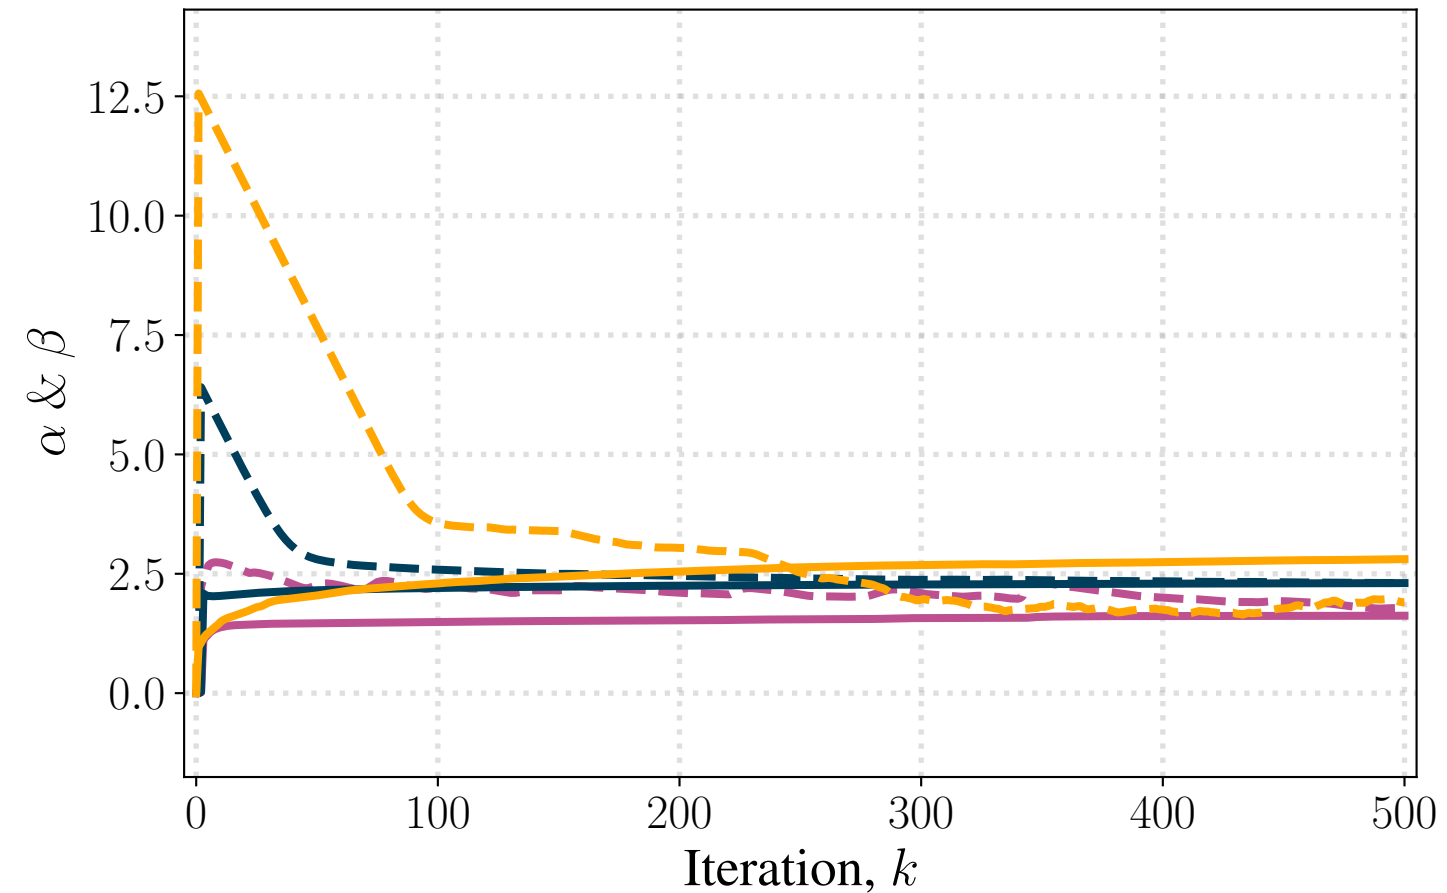

PGD SOUL JALA-EM Test Error /  $\alpha$  LPPD /  $\beta$

Supplement: supplementary_material [file BNN_experiment_N100_K500_C952.pdf › BNN_experiment_N100_K500_C952.pdf]

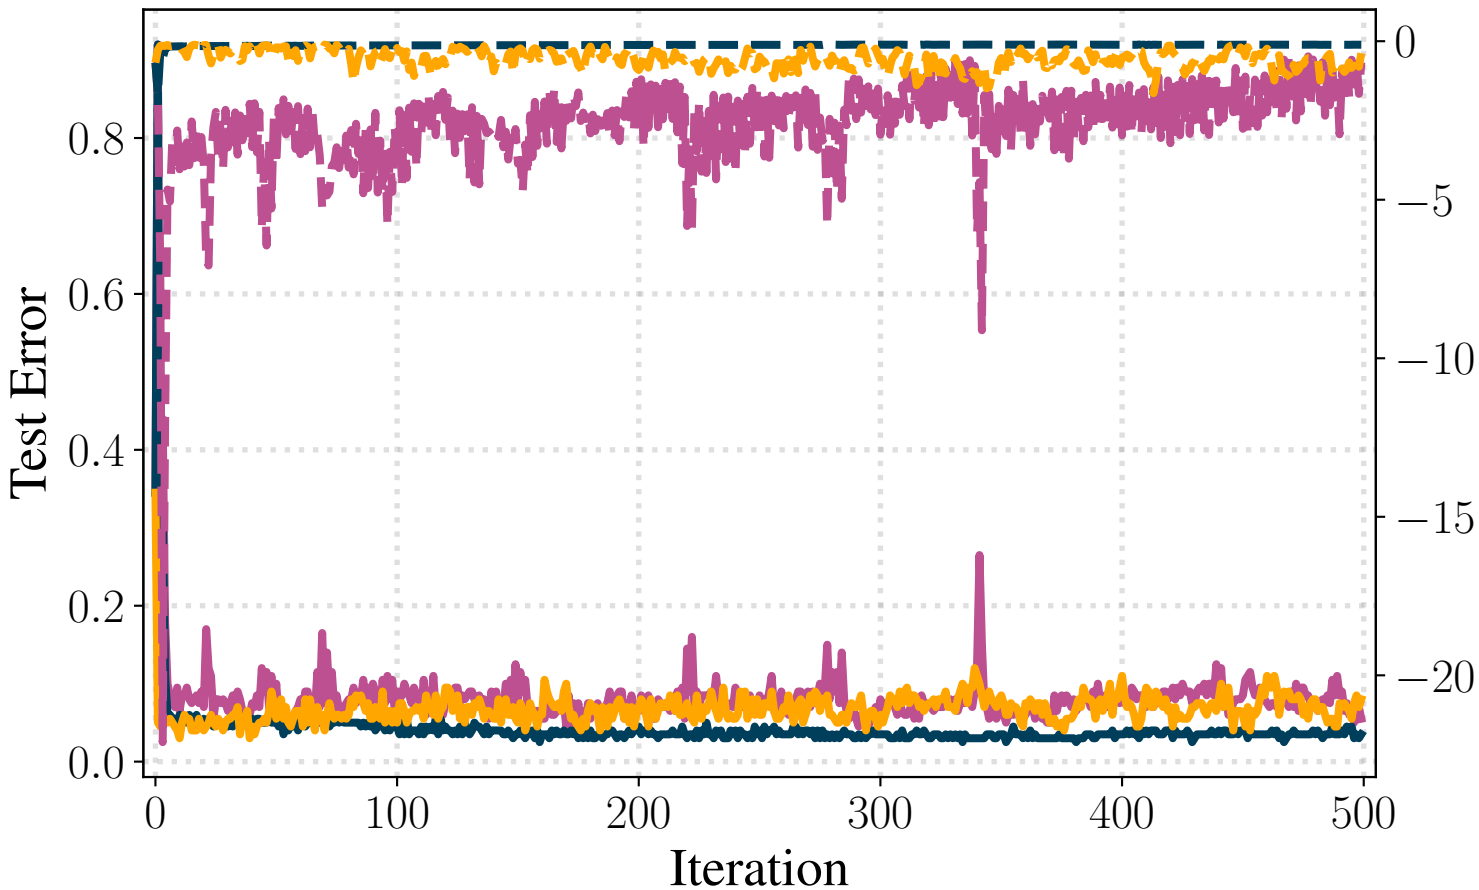

JALA-EM PGD SOUL

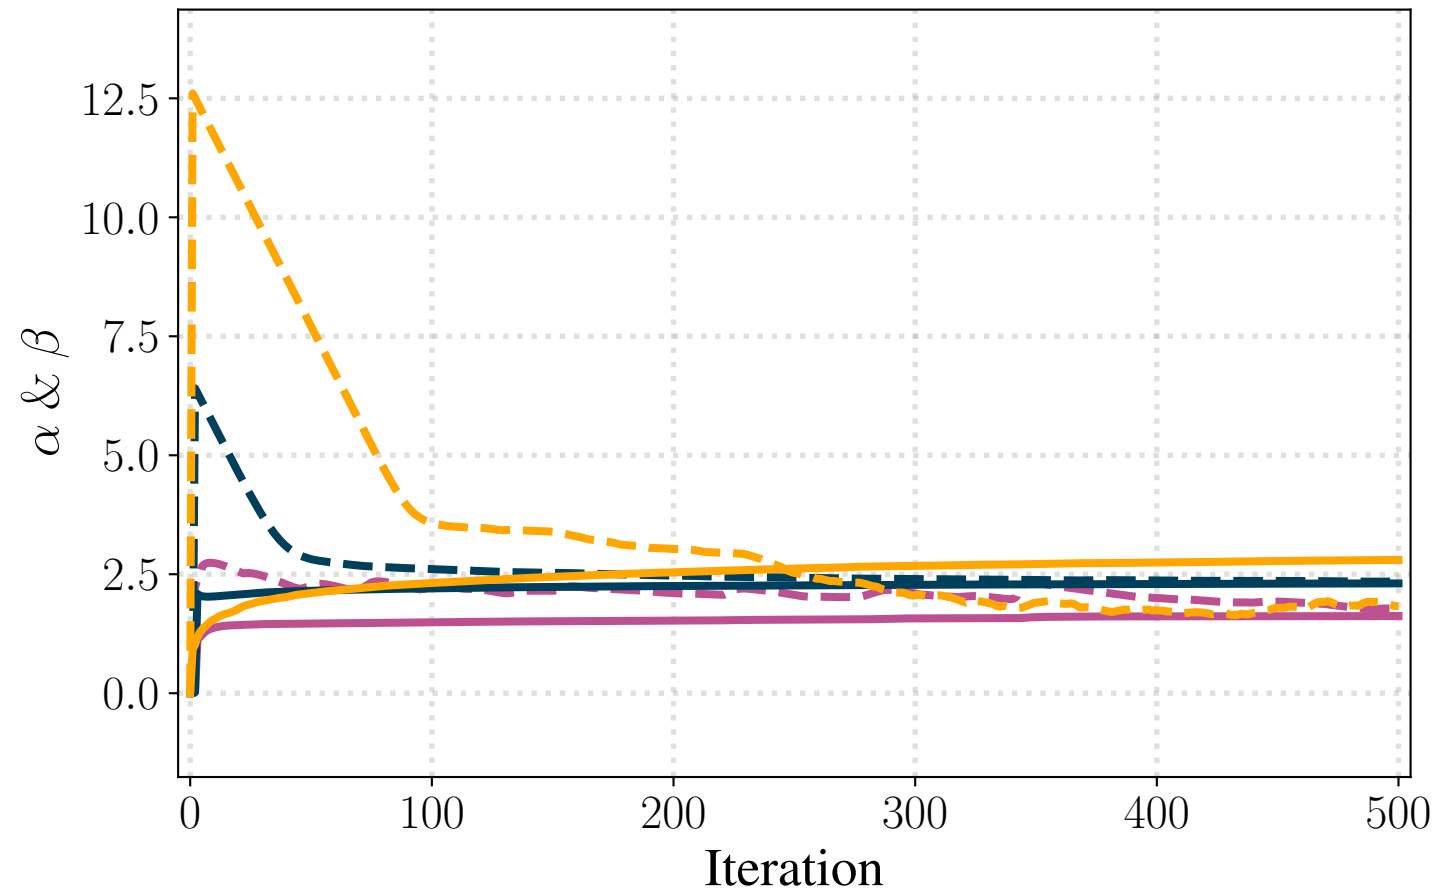

Test Error /  $\alpha$  LPPD /  $\beta$

Supplement: supplementary_material [file Loaded_Plot_N100_K500_C0.952.pdf › Loaded_Plot_N100_K500_C0.952.pdf]

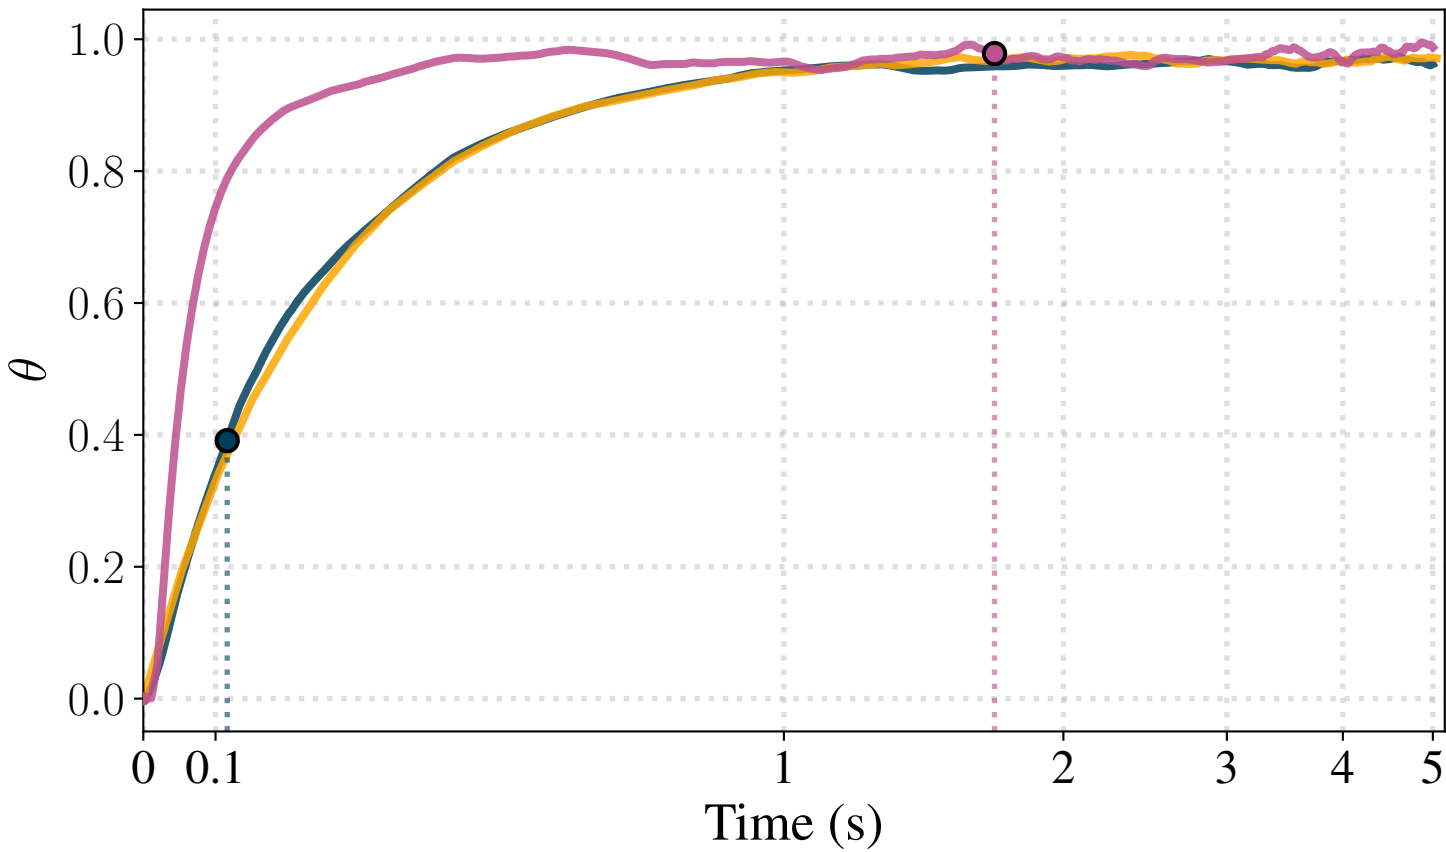

PGD

SOUL

JALA-EM

200 Iter.

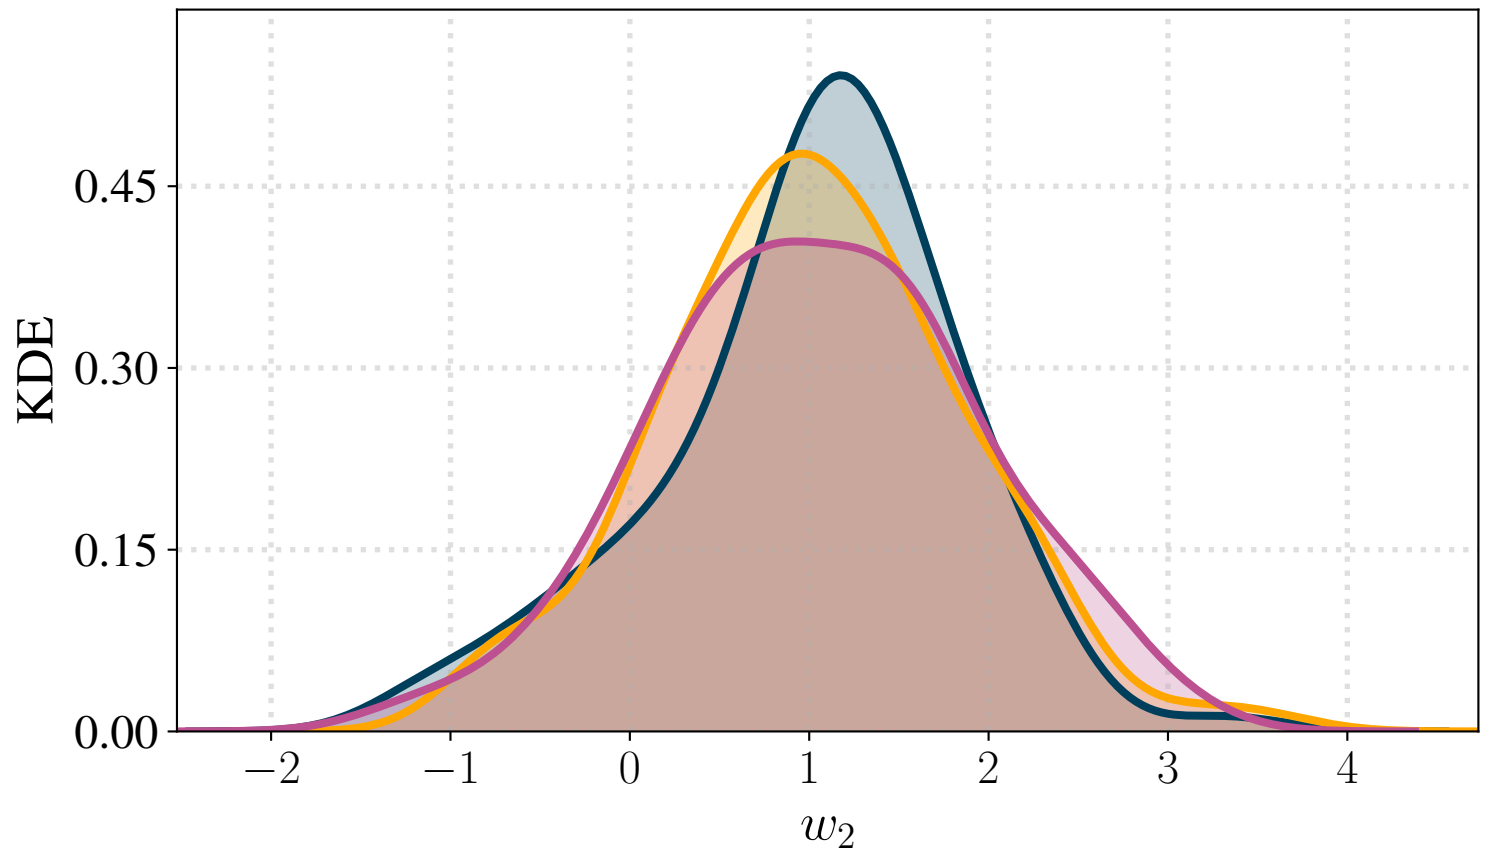

Supplement: supplementary_material [file final_blr_N_equals_100_final.pdf › final_blr_N_equals_100_final.pdf]

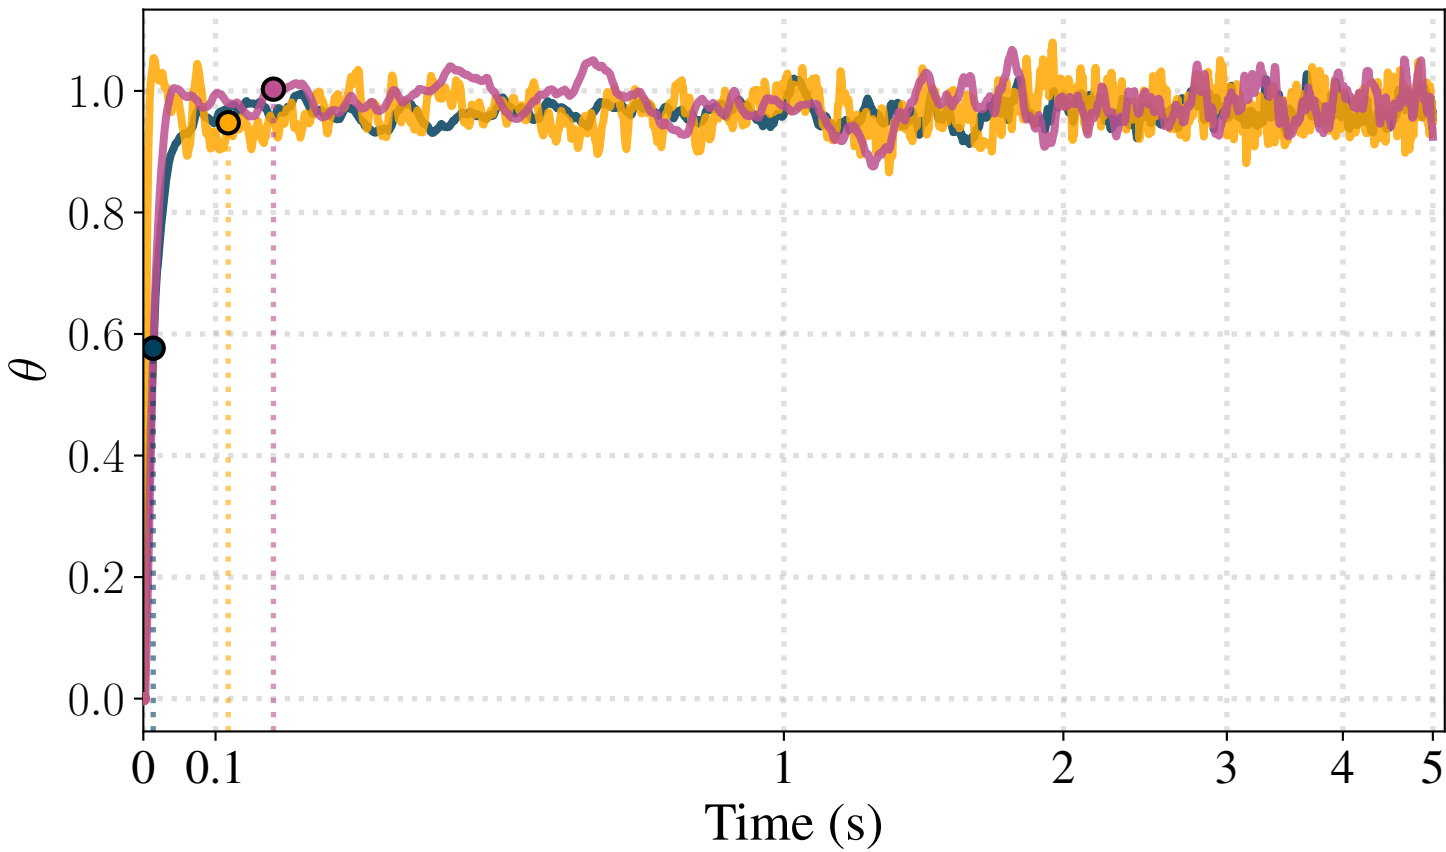

PGD

SOUL

JALA-EM

200 Iter.

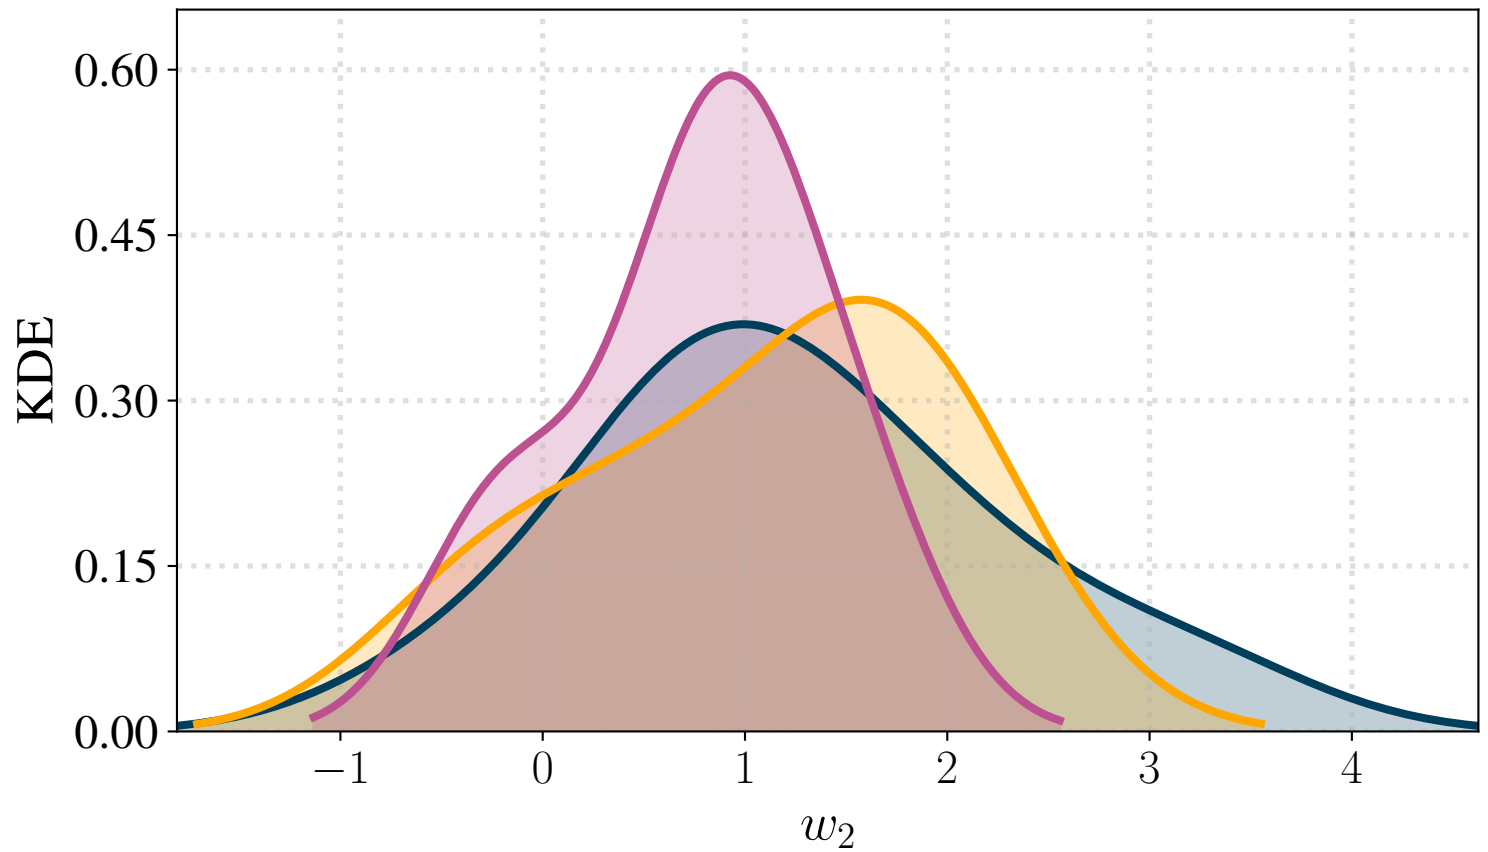

Supplement: supplementary_material [file final_blr_N_equals_10_final.pdf › final_blr_N_equals_10_final.pdf]

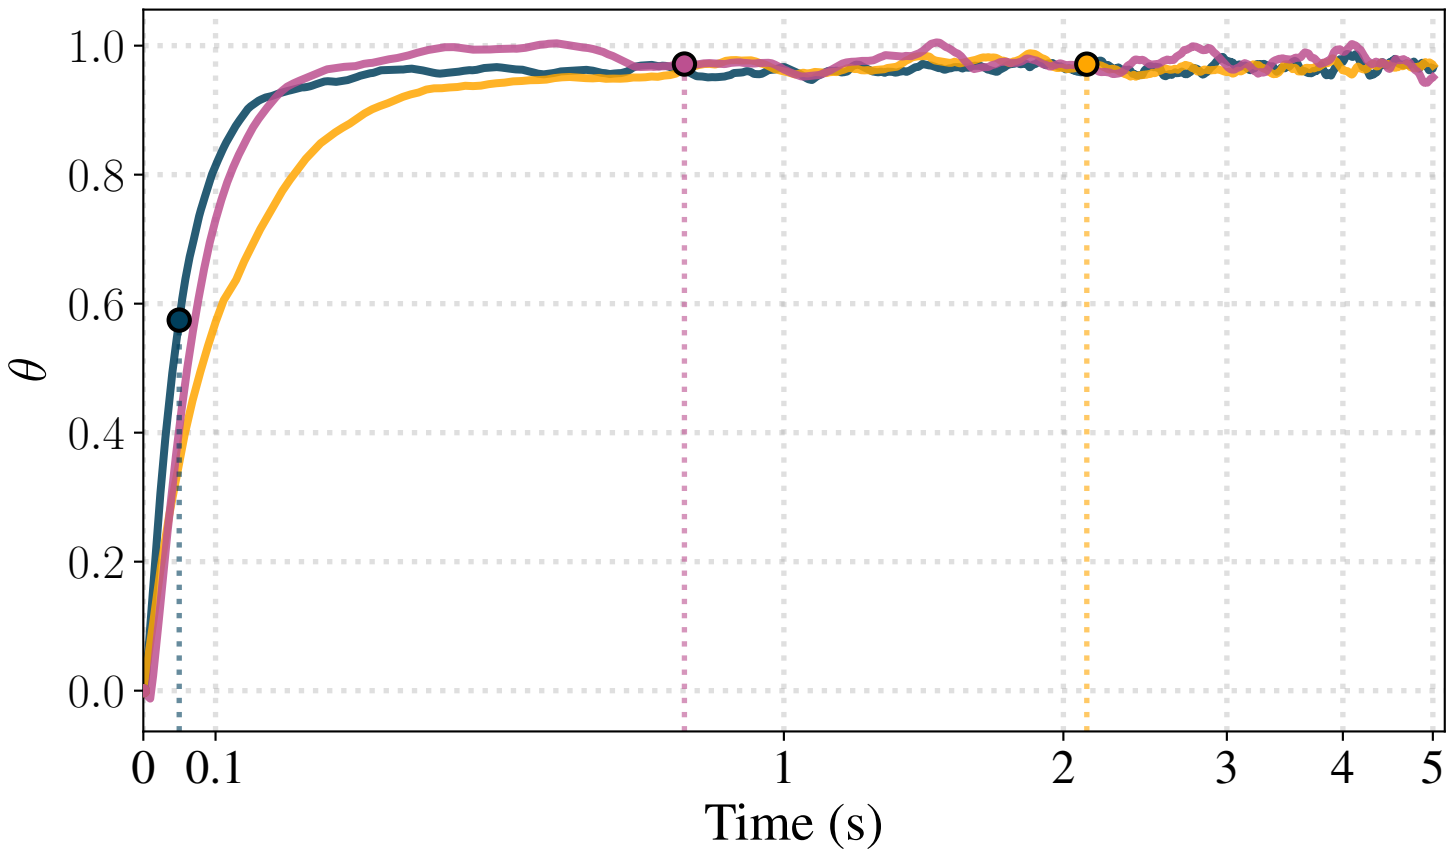

PGD

SOUL

JALA-EM

200 Iter.

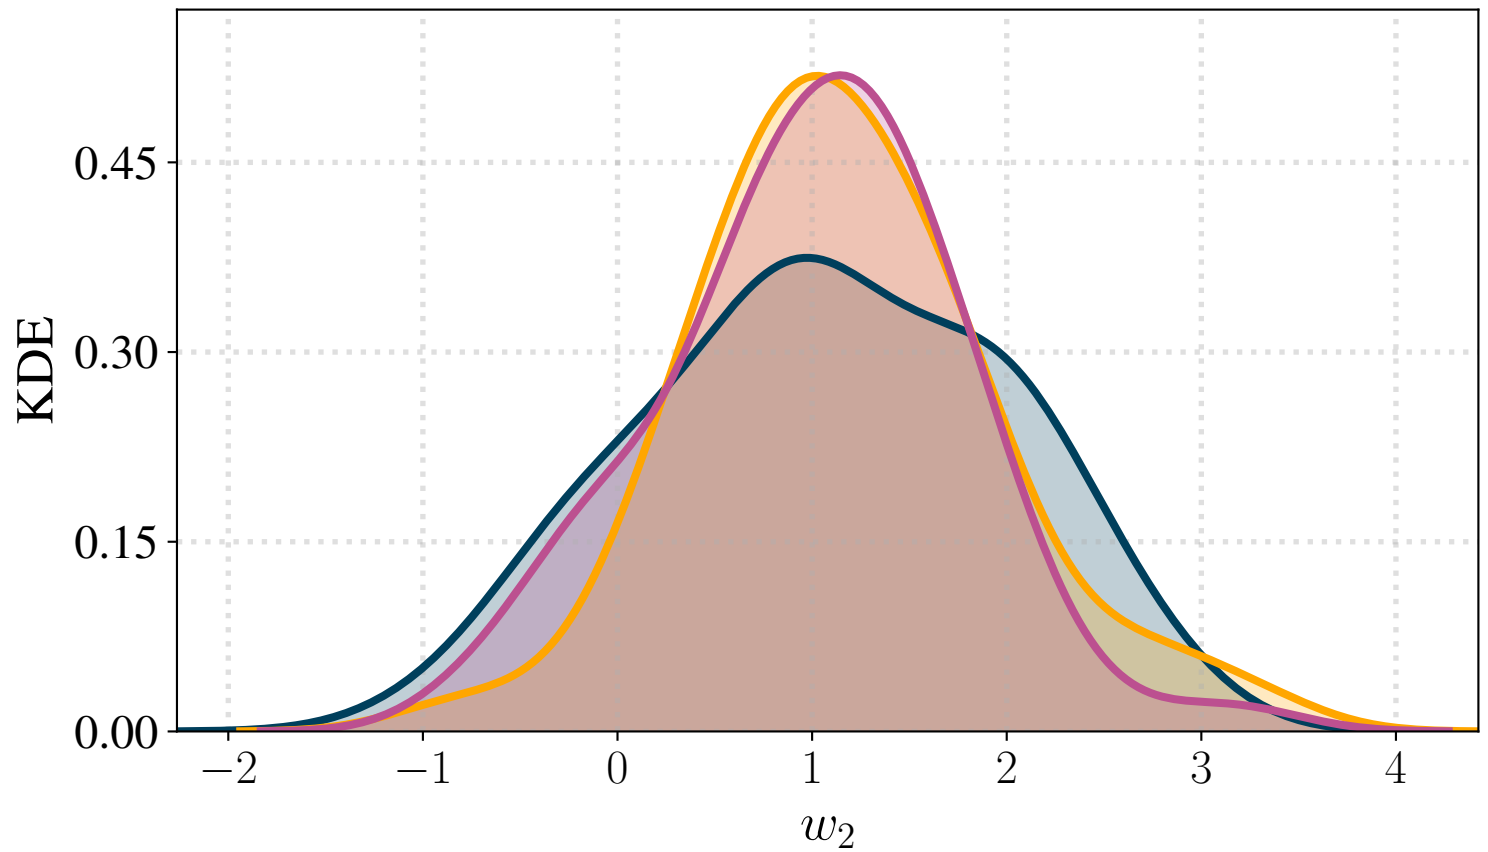

Supplement: supplementary_material [file final_blr_N_equals_50_final.pdf › final_blr_N_equals_50_final.pdf]

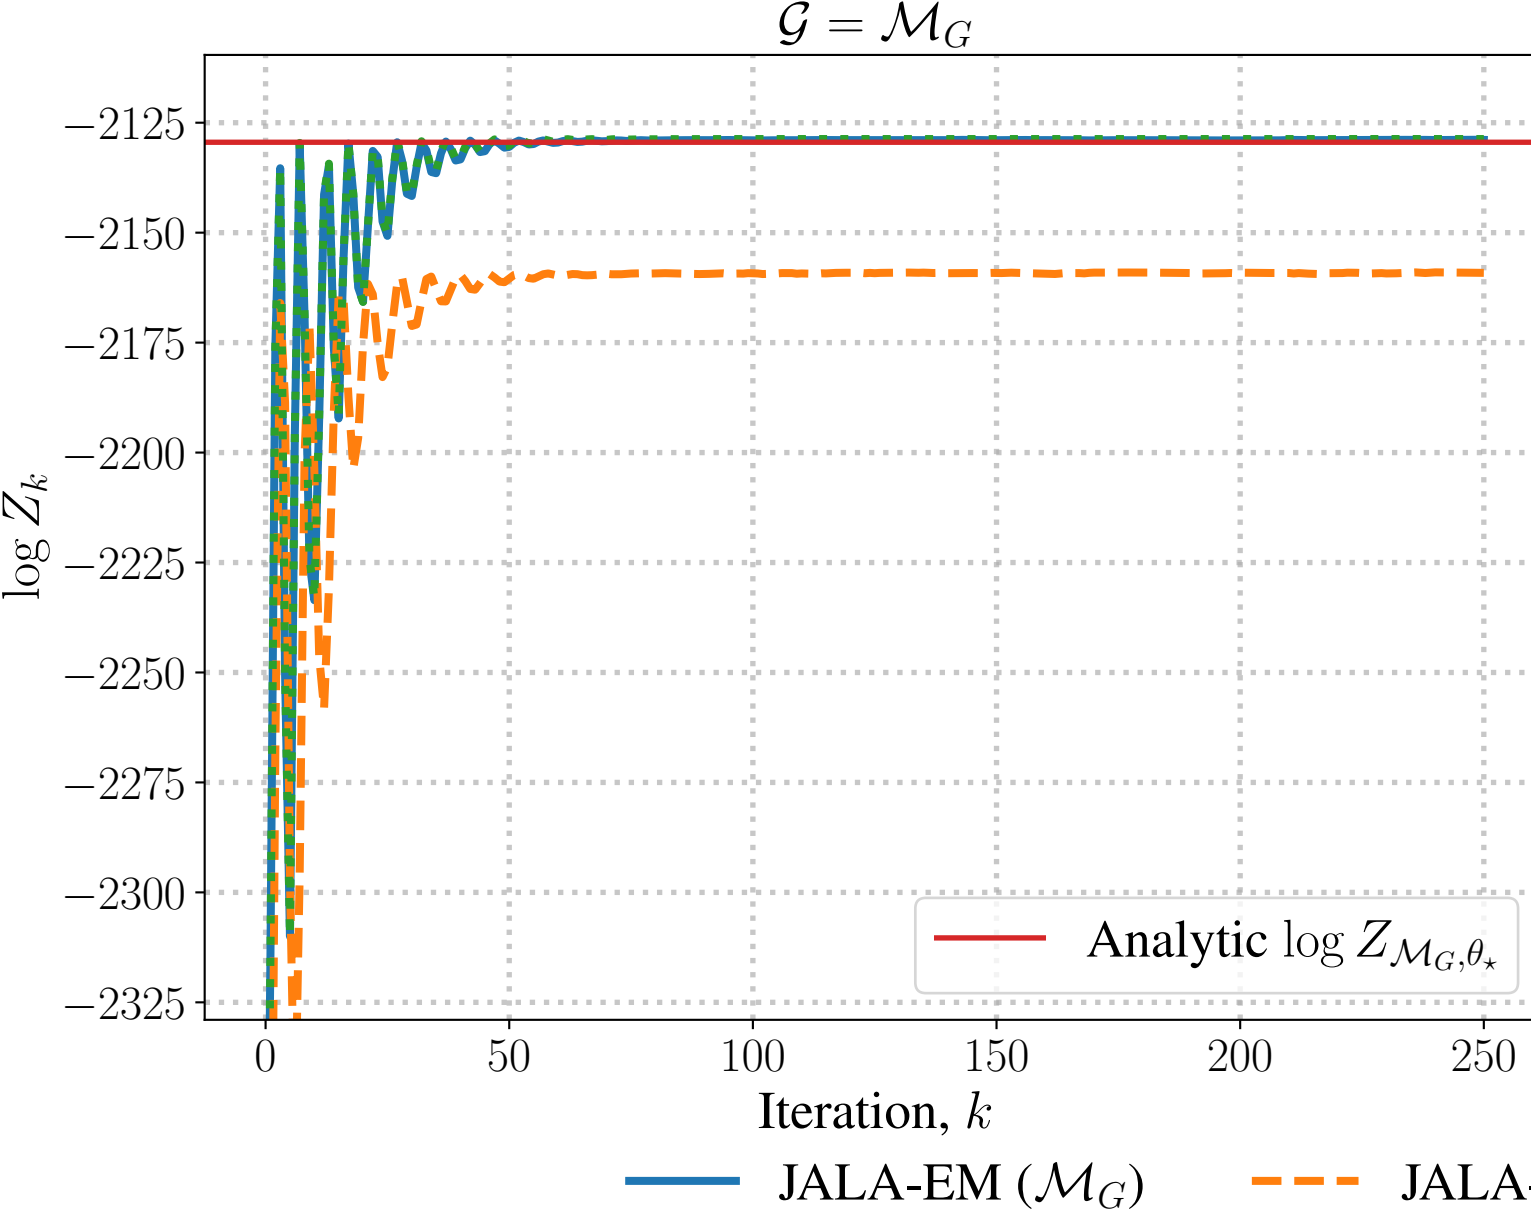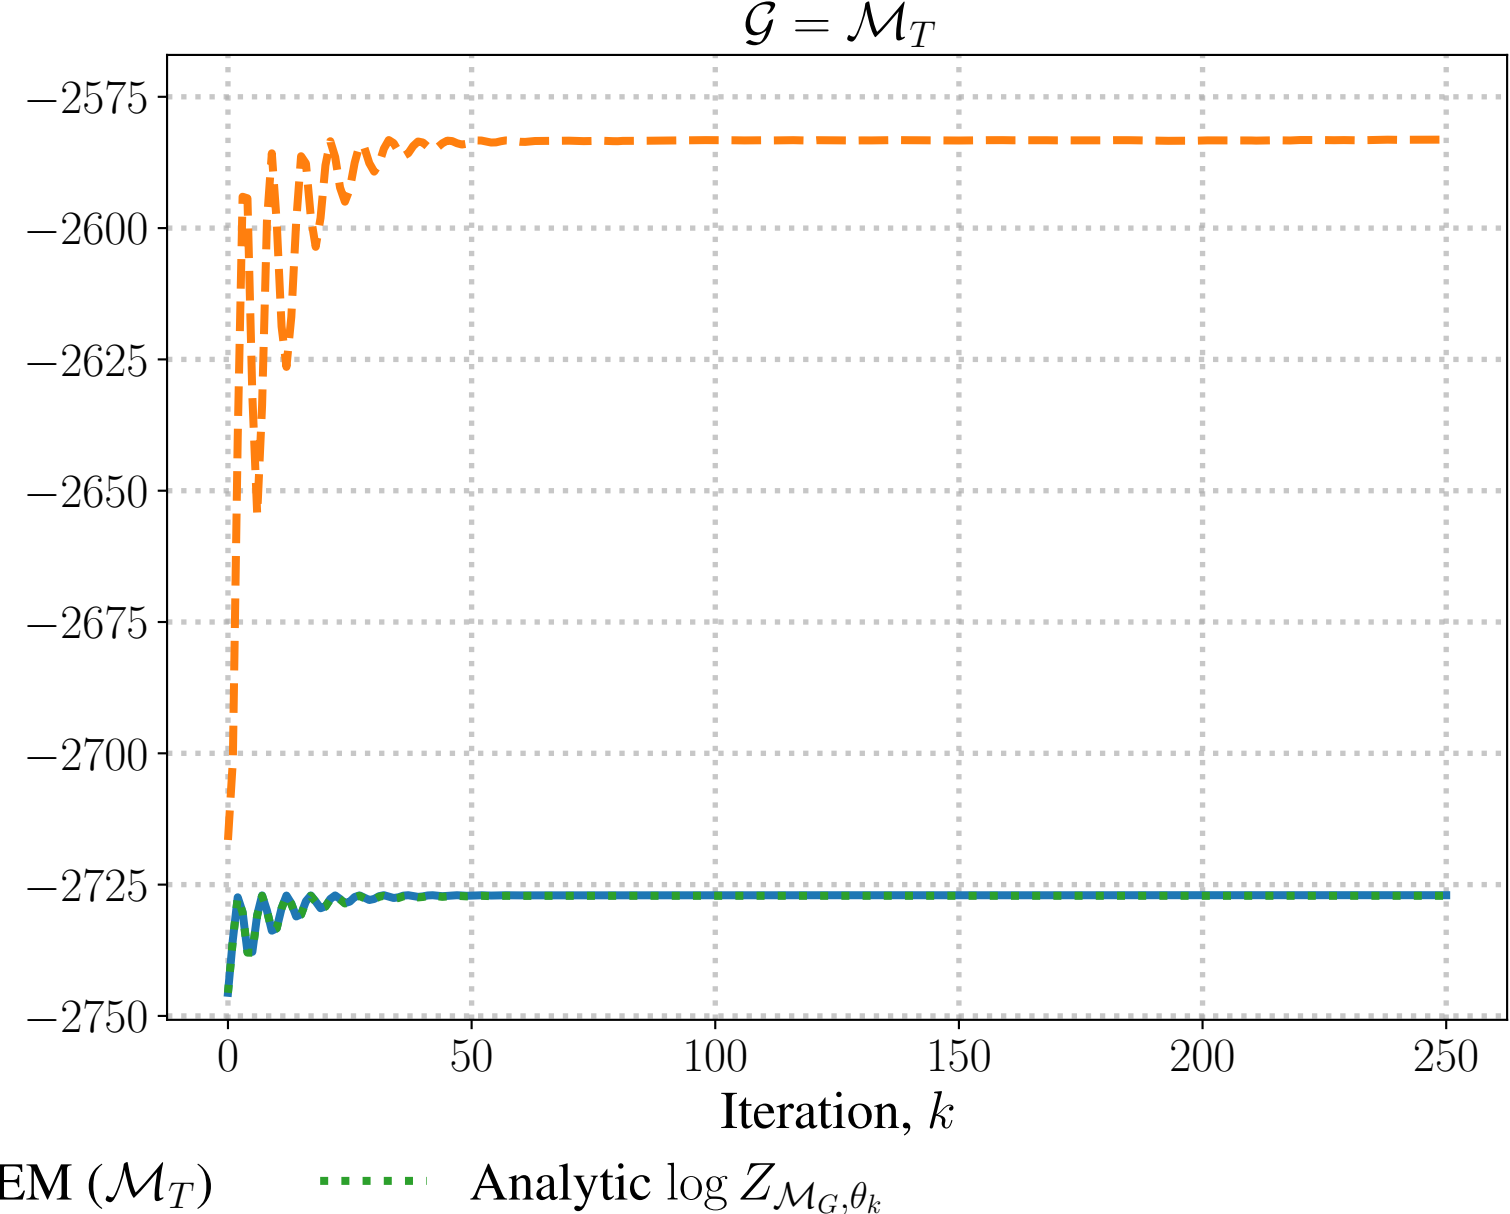

Supplement: supplementary_material [file logZ_side_by_side_latex_1500_datapoints.pdf › logZ_side_by_side_latex_1500_datapoints.pdf]

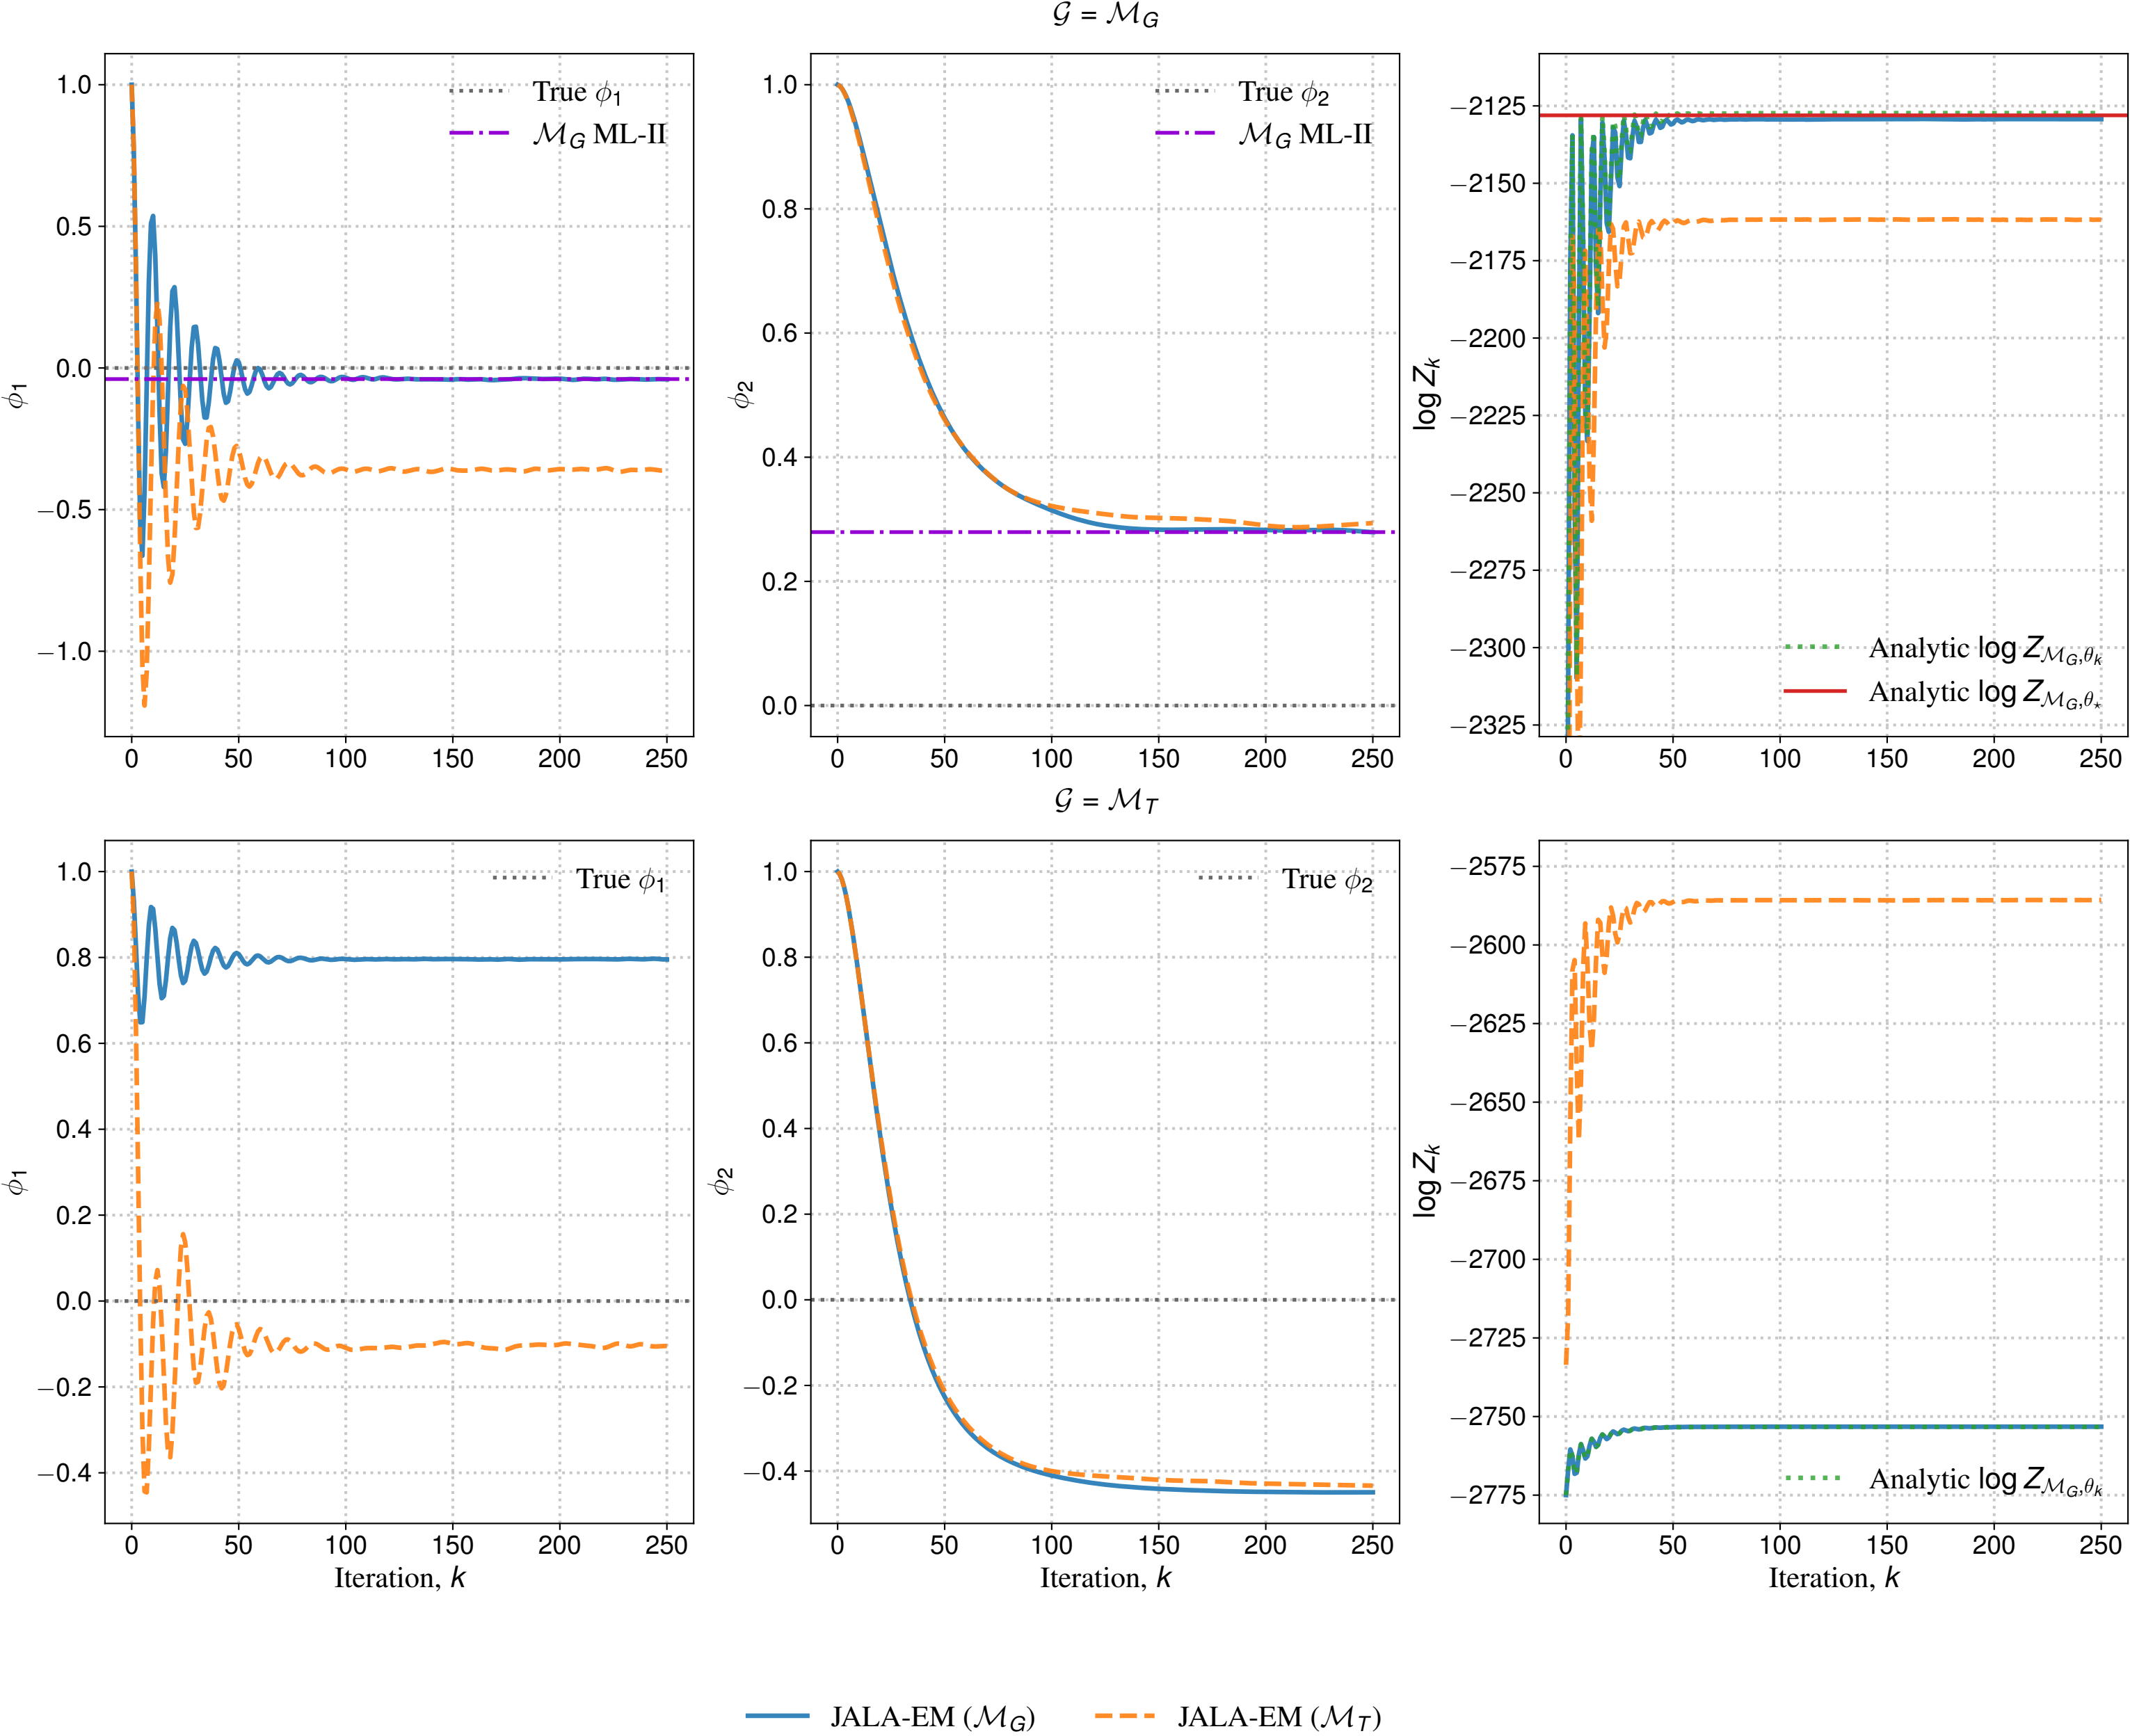

Supplement: supplementary_material [file stacked_M1500_D8_for_report.pdf › stacked_M1500_D8_for_report.pdf]

$$\mathcal{G} = \mathcal{M}_G$$

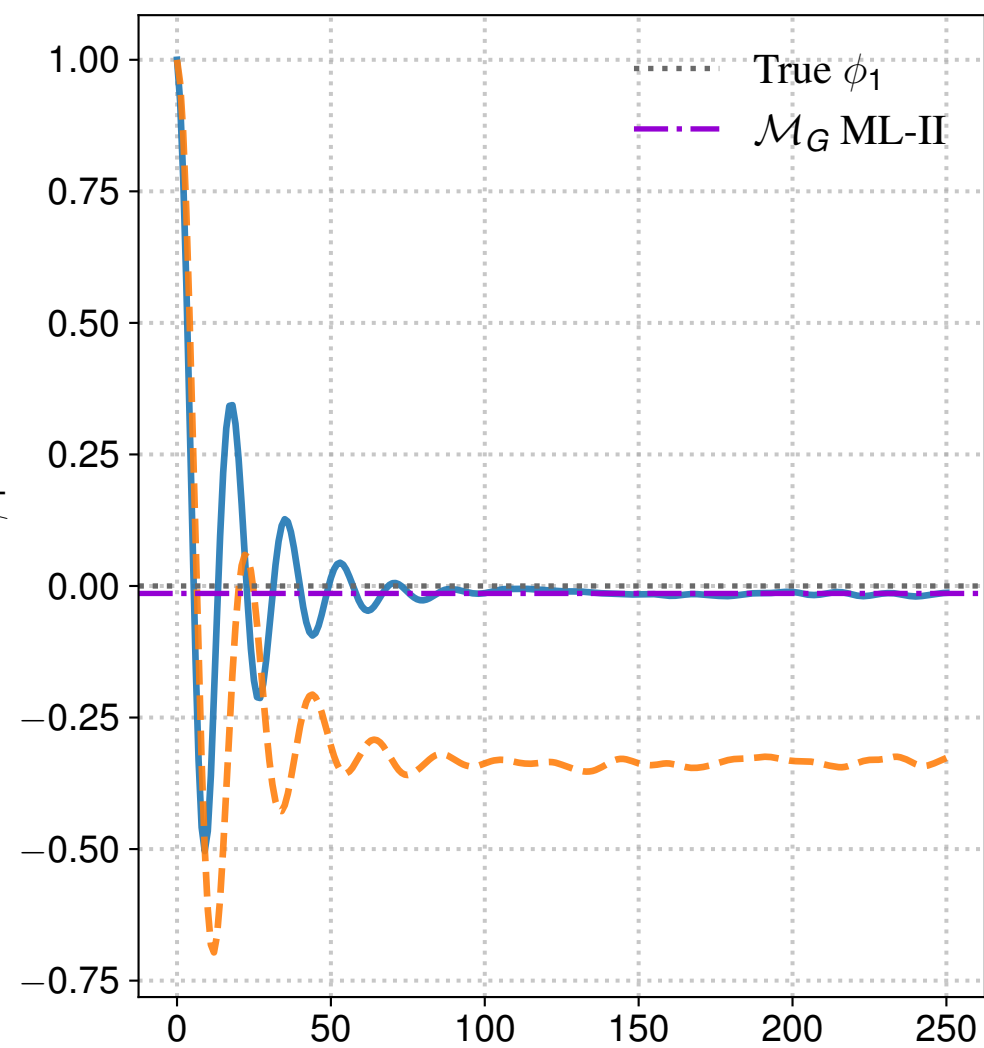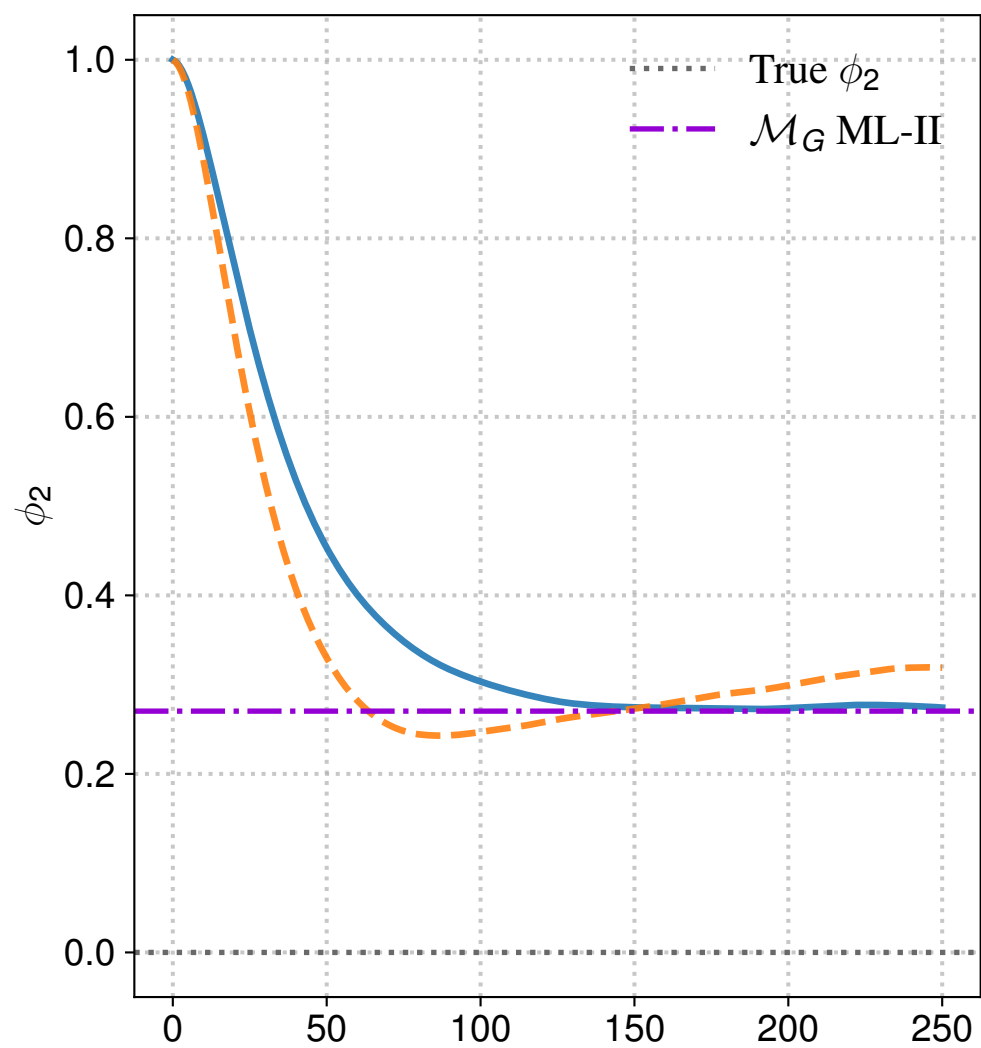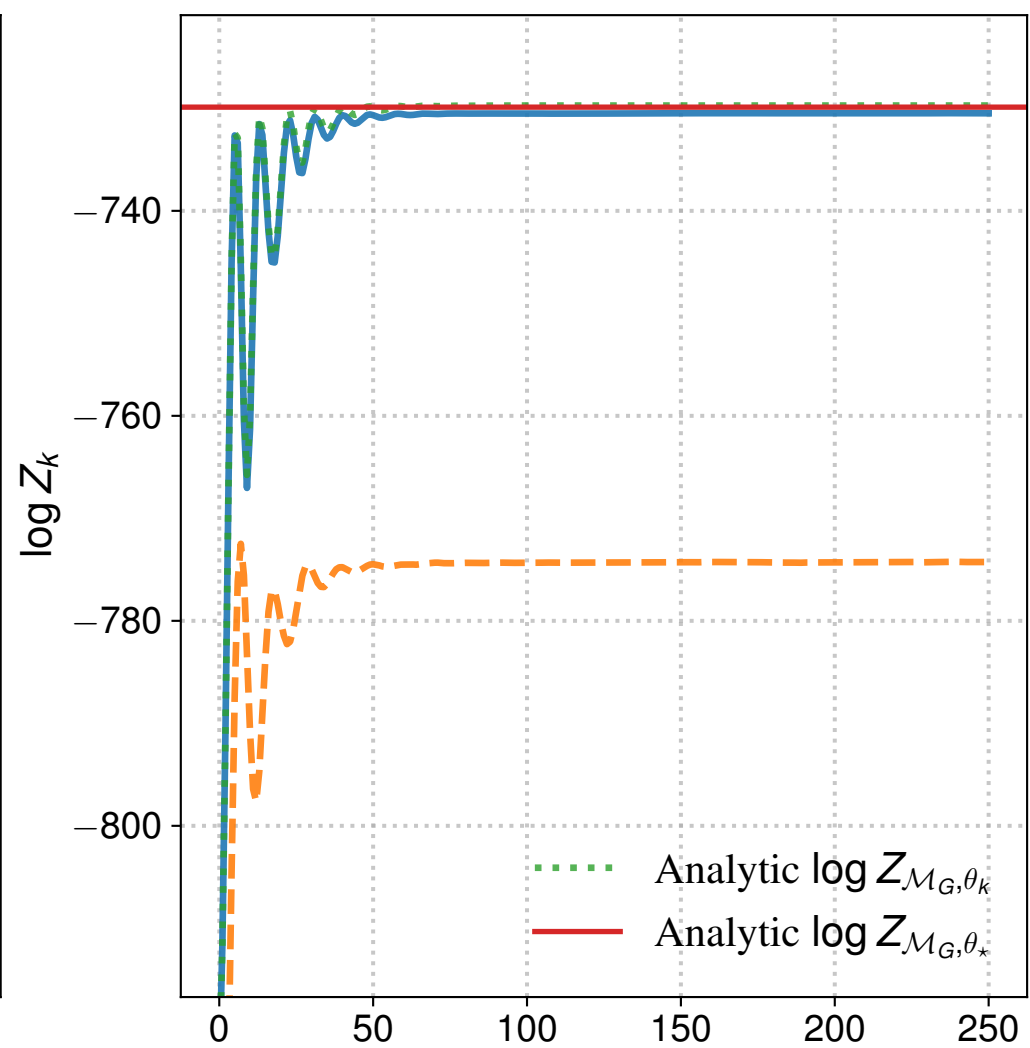

$$\mathcal{G} = \mathcal{M}_T$$

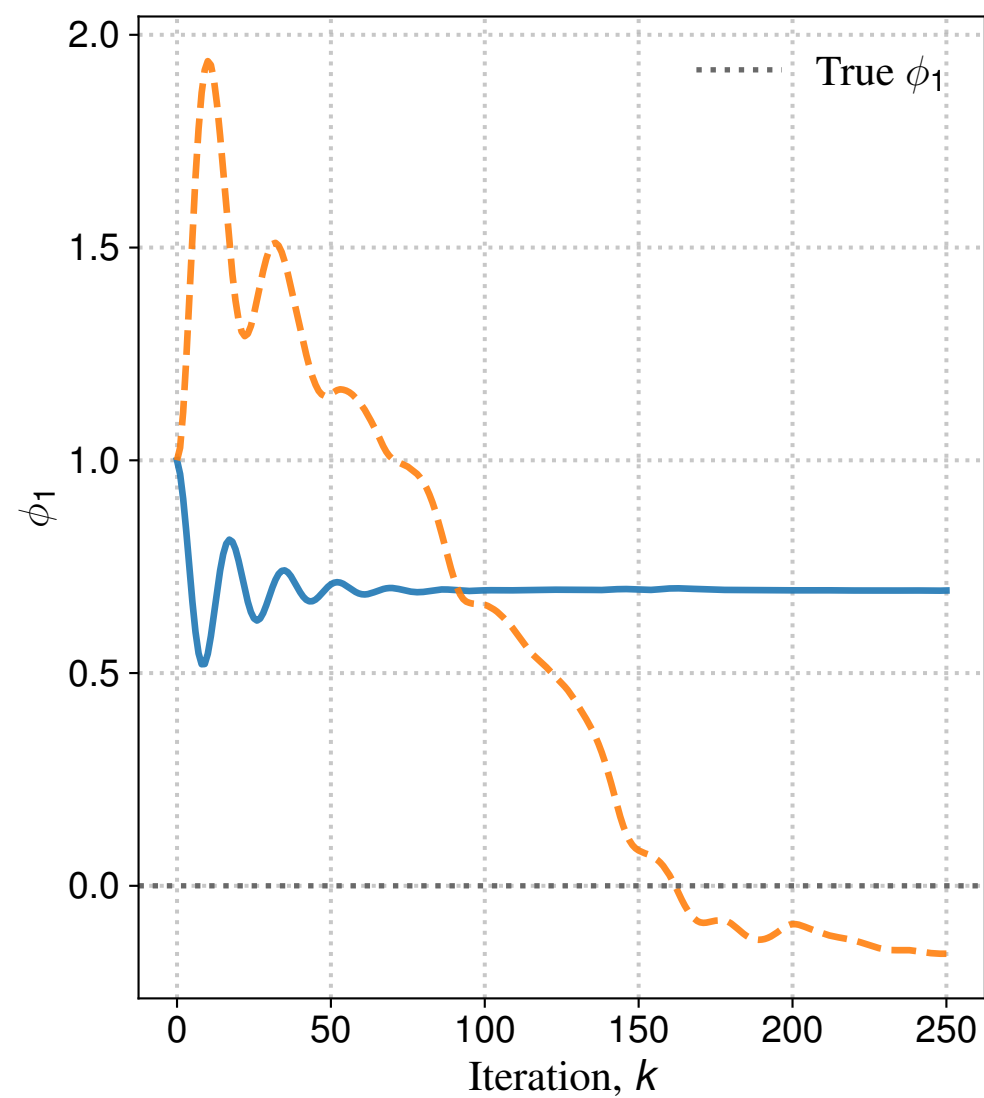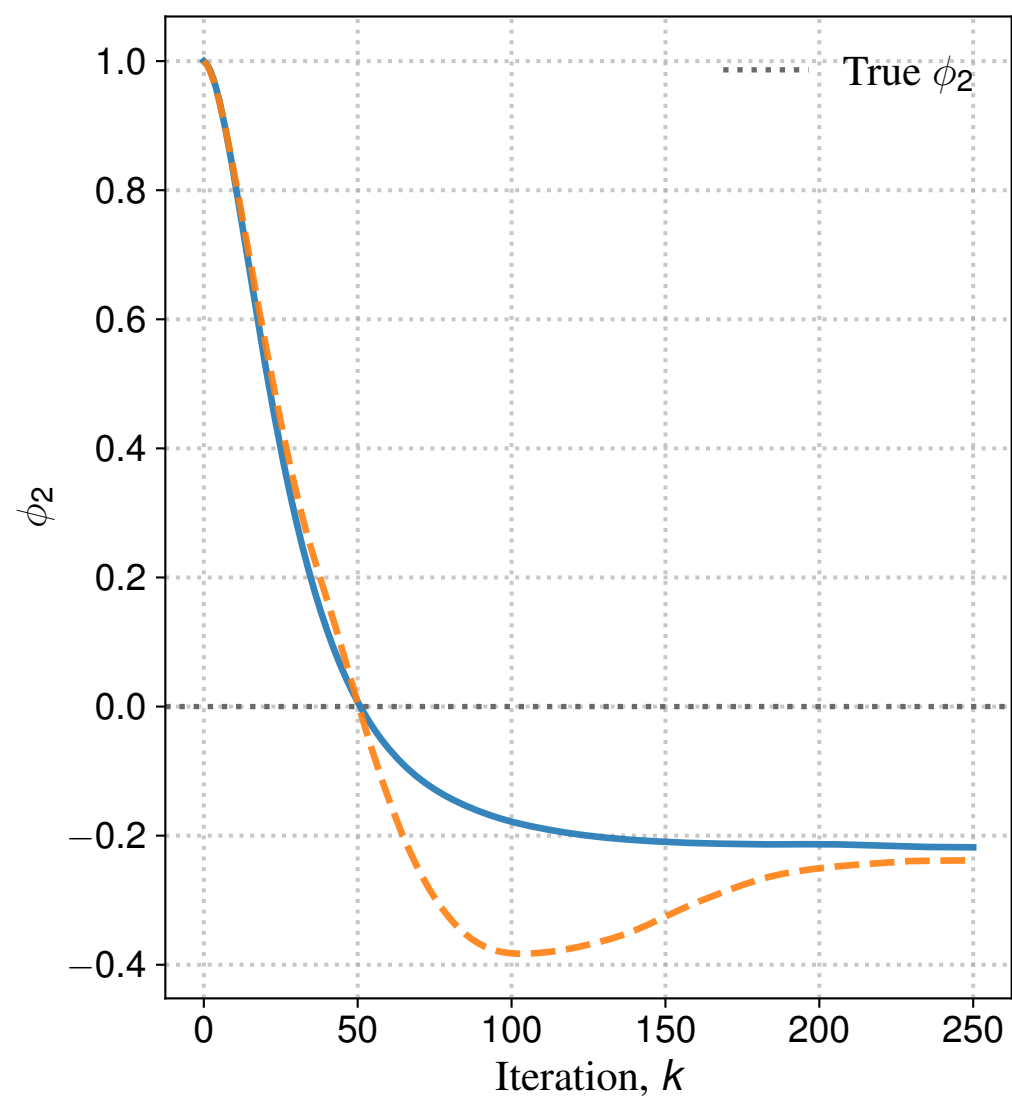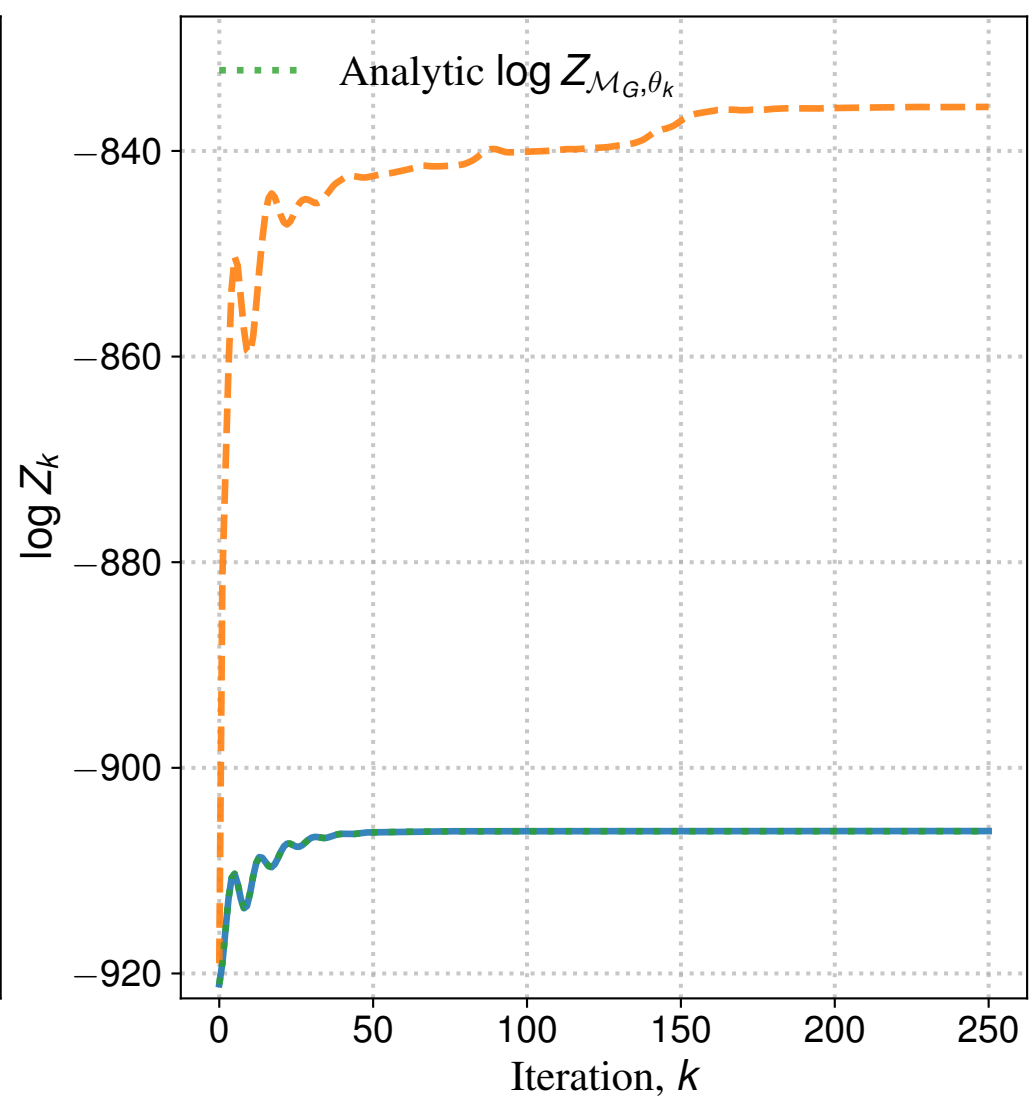

— JALA-EM ( $\mathcal{M}_G$ )    - - - JALA-EM ( $\mathcal{M}_T$ )

Supplement: supplementary_material [file stacked_M500_D8_for_report.pdf › stacked_M500_D8_for_report.pdf]
